# Supplementary material
Source: MDPI journal article supplement (https://www.mdpi.com/1999-4907/11/9/997)
Supplement: s1 [file s1]

**Supplementary Materials:** The following are available online at [www.mdpi.com/xxx/s1](http://www.mdpi.com/xxx/s1)

**Table S1.** Probability (Pr > F) for testing treatment effect with PROC MIXED in SAS for various carbon pools at age 28 and 54 in a ponderosa pine plantation grown under overstory planted at 1.8, 3.7, and 5.5 m spacing plots, which are split with competing vegetation control (VC) and non-control (NVC) subplots in Challenge Experimental Forest, California, USA.

| Source of variation | Num DF /Den DF | O horizon* | Woody debris* | Forest floor* | Competing vegetation* | Live planted pines | Mortality    | Planted pine trees | Total ecosystem C |
|---------------------|----------------|------------|---------------|---------------|-----------------------|--------------------|--------------|--------------------|-------------------|
| Mg ha <sup>-1</sup> |                |            |               |               |                       |                    |              |                    |                   |
| <u>Age 28</u>       |                |            |               |               |                       |                    |              |                    |                   |
| Space               |                |            |               |               |                       |                    |              |                    |                   |
| Veg control         | 2/2            | 0.592      | 0.153         | 0.674         | 0.183                 | 0.295              | No mortality | Same as live trees | 0.328             |
| Space x Veg         | 1/3            | 0.021      | 0.371         | 0.032         | 0.002                 | 0.036              |              |                    | 0.047             |
| control             | 2/3            | 0.165      | 0.379         | 0.204         | 0.420                 | 0.477              |              |                    | 0.920             |
| <u>Age 52</u>       |                |            |               |               |                       |                    |              |                    |                   |
| Space               |                |            |               |               |                       |                    |              |                    |                   |
| Veg control         | 2/2            | 0.092      | 0.822         | 0.094         | 0.577                 | 0.586              | 0.060        | 0.855              | 0.928             |
| Space x Veg         | 1/3            | 0.643      | 0.003         | 0.461         | 0.001                 | 0.709              | 0.419        | 0.583              | 0.361             |
| control             | 2/3            | 0.075      | 0.022         | 0.067         | 0.015                 | 0.800              | 0.751        | 0.701              | 0.799             |

\* Variables were log-transformed before the analysis. Red and bold numbers highlight a significant treatment effect. Yellow highlights are those tests with 0.05 < P < 0.08.

**Table S2.** Probability (Pr > F) for testing treatment effect with PROC MIXED in SAS for soil carbon at age 28 and 54.

| Source of variation | Num DF /Den DF | 28-yr soil C | 52-yr soil C |
|---------------------|----------------|--------------|--------------|
| Space               | 4/4            | 0.306        | 0.645        |
| Veg control         | 1/15           | 0.816        | 0.026        |
| Space x Veg control | 4/15           | 0.066        | 0.299        |
| Depth               | 1/15           | 0.018        | 0.001        |
| Space x depth       | 4/15           | 0.644        | 0.141        |
| Veg x depth         | 1/15           | 0.667        | 0.114        |
| Space x veg x depth | 4/15           | 0.459        | 0.477        |

Red and bold numbers highlight a significant treatment effect. Yellow highlights are those tests with 0.05 < P < 0.08.
